# Supplementary material
Source: PubMed Central journal article supplement (PMC2640968)

**Table S1** The spin-spin coupling constants ( ${}^3J_{\text{HN}\alpha}$ ) of SBP-W2DP6V.

| Residue | ${}^3J_{\text{HN}\alpha}$ (HZ) |
|---------|--------------------------------|
| Met3    | 6.76                           |
| Thr4    | 7.09                           |
| Thr5    | 7.61                           |
| Val6    | 6.95                           |
| Trp7    | 7.09                           |
| Gly8    | 6.29                           |
| Phe9    | 6.79                           |
| Leu10   | 7.18                           |
| His11   | 7.69                           |

**Table S2** <sup>1</sup>H chemical shift assignment (in ppm) for SBP-W2DP6V at 298 K and pH 6.1.

| Residue | NH   | $\alpha$ -CH  | $\beta$ -CH   | $\gamma$ -CH  | $\delta$ -CH  | others                                            | $\alpha$ protons <sup>a</sup> | Chemical shift index |
|---------|------|---------------|---------------|---------------|---------------|---------------------------------------------------|-------------------------------|----------------------|
| Ser1    |      | 4.15          | 3.98,<br>3.99 |               |               |                                                   | $4.50 \pm 0.1$                | -1                   |
| Asp2    | 8.80 | 4.71          | 2.68,<br>2.78 |               |               |                                                   | $4.76 \pm 0.1$                | 0                    |
| Met3    | 8.58 | 4.53          | 1.99,<br>2.11 | 2.53,<br>2.61 |               | $\epsilon$ -CH3 2.01                              | $4.52 \pm 0.1$                | 0                    |
| Thr4    | 8.30 | 4.29          | 4.23          |               |               | $\gamma$ -CH3 1.19                                | $4.35 \pm 0.1$                | 0                    |
| Thr5    | 8.07 | 4.29          | 4.15          |               |               | $\gamma$ -CH3 1.08                                | $4.35 \pm 0.1$                | 0                    |
| Val6    | 7.98 | 4.04          | 2.01          |               |               | $\gamma$ -CH3 0.84, 0.86                          | $3.95 \pm 0.1$                | 0                    |
| Trp7    | 8.22 | 4.56          | 3.25,<br>3.25 |               |               | 2H 7.23, 4H 7.59,<br>5H 7.15, 6H 7.21,<br>7H 7.41 | $4.70 \pm 0.1$                | -1                   |
| Gly8    | 8.21 | 3.76,<br>3.86 |               |               |               |                                                   | $3.97 \pm 0.1$                | -1                   |
| Phe9    | 7.85 | 4.54          | 3.05,<br>3.12 |               |               | 2,6H 7.22; 3,5H<br>7.33; 4H 7.25                  | $4.66 \pm 0.1$                | -1                   |
| Leu10   | 7.94 | 4.19          | 1.33,<br>1.52 | 1.48          |               | $\delta$ -CH3 0.82, 0.88                          | $4.17 \pm 0.1$                | 0                    |
| His11   | 8.19 | 4.89          | 2.89,<br>3.11 |               |               | 2H 8.42; 4H 7.03                                  | $4.63 \pm 0.1$                | 1                    |
| Pro12   |      | 4.39          | 1.95,<br>2.27 | 1.97,<br>1.98 | 3.52,<br>3.57 | -NH2 7.05, 7.73                                   | $4.44 \pm 0.1$                | 0                    |

<sup>a</sup>, standard chemical shift values of  $\alpha$ -protons (26)

**Table S3** NMR structural statistics

| Experimental restraints                 | Number       |
|-----------------------------------------|--------------|
| Sequential backbone NOEs (i, i+1)       | 17           |
| Sequential non backbone NOEs (i, i+1)   | 40           |
| Inter-residue NOEs (i, i+2-4)           | 30           |
| Average energy                          | 299 kcal/mol |
| NOE constraints                         | 31 Kcal/mol  |
| Rmsd from backbone (3-11)               | 0.26±0.11 Å  |
| Nonhydrogen heavy atoms (residues3-11)  | 0.99±0.19 Å  |
| Rachandran statistics from PROCHECK-NMR |              |
| Most favored regions, %                 | 66.0         |
| Additional allowed regions, %           | 31.1         |
| Generously allowed regions, %           | 0            |
| Disallowed regions, %                   | 2.9          |

## Figure legend

**Fig.S1** Binding of SBP-W2DP6V to the GroEL apical domain. **A)** Titration of fluoresceinated peptides with the apical domain monitored by fluorescence polarization.  $f_B$  is the fraction of the apical domain-bound peptide. The average values and the derived errors from two measurements were shown, along with the fitting curve. Circles, SBP-P6VW2D; triangles, SBP-P6V; squares, SBP. **B)** One-dimensional proton NMR spectra of SBP-W2DP6V in the absence (2 mM, bottom panel) and presence of the MBP-apical domain (50  $\mu$ M, top panel). The buffer was 50 mM potassium phosphate pH 6.1.

**Fig.S2** Effects of the peptide binding on the  $^1\text{H}$ - $^{15}\text{N}$  HSQC spectrum of the GroEL apical domain. Shown here is a selected region of the overlaid  $^1\text{H}$ - $^{15}\text{N}$  HSQC spectra of the apical domain in isolation (black, 0.28mM) and with the peptide (red) (protein 0.28mM, peptide 0.56mM).

**Fig.S3** Circular dichroism spectrum of SBP-W2DP6V (150  $\mu$ M) in 10 mM sodium phosphate (pH6.1) and 10 mM NaCl at 25  $^\circ\text{C}$ . Shown here is the average of three measurements.

**Fig.S4** 2D NOESY spectra of SBP-W2DP6V (2 mM) in presence of tetradecameric GroEL (1.4  $\mu$ M).

**Fig.S5** Model of SBP-W2DP6V bound to the GroEL apical domain.

Fig.S1

A)

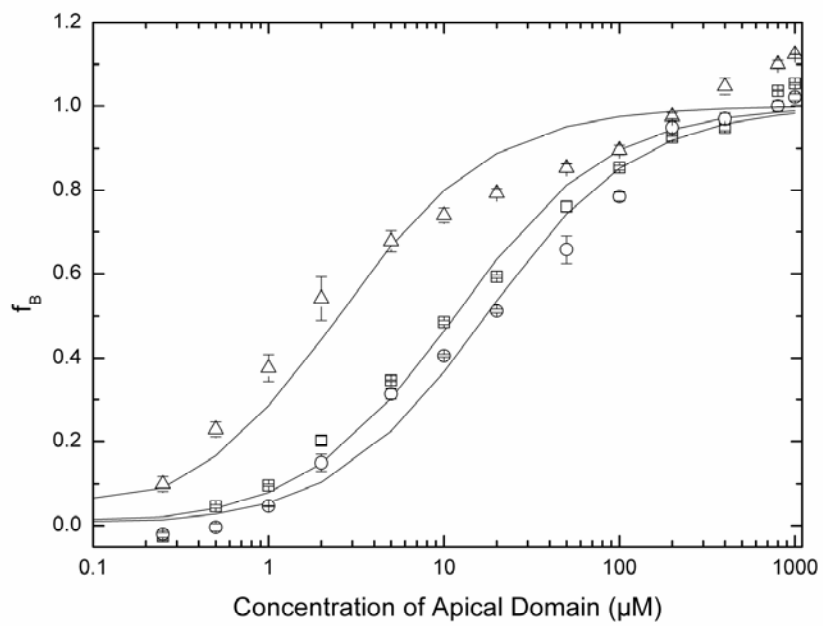

Fig.S1

B)

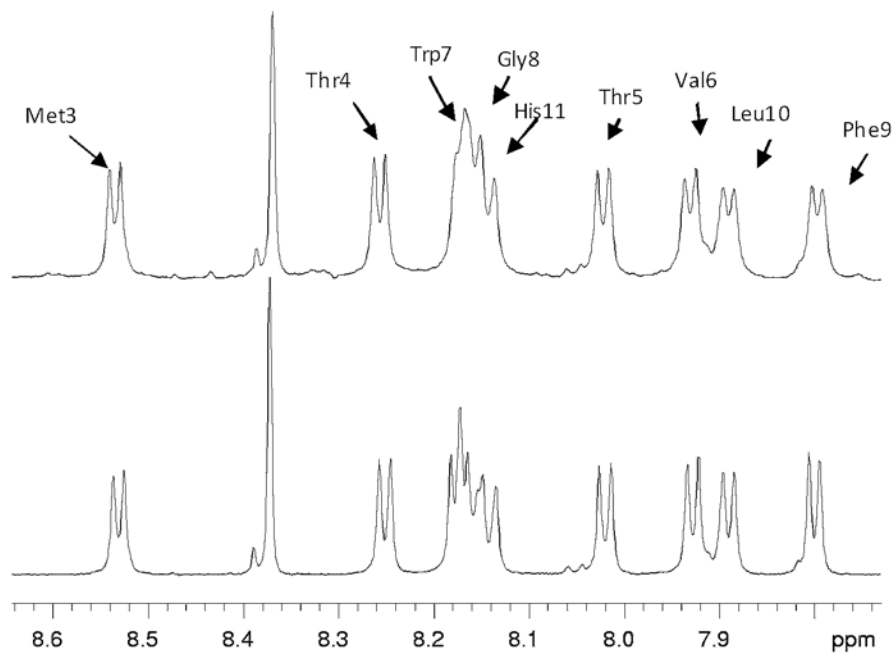

Fig.S2

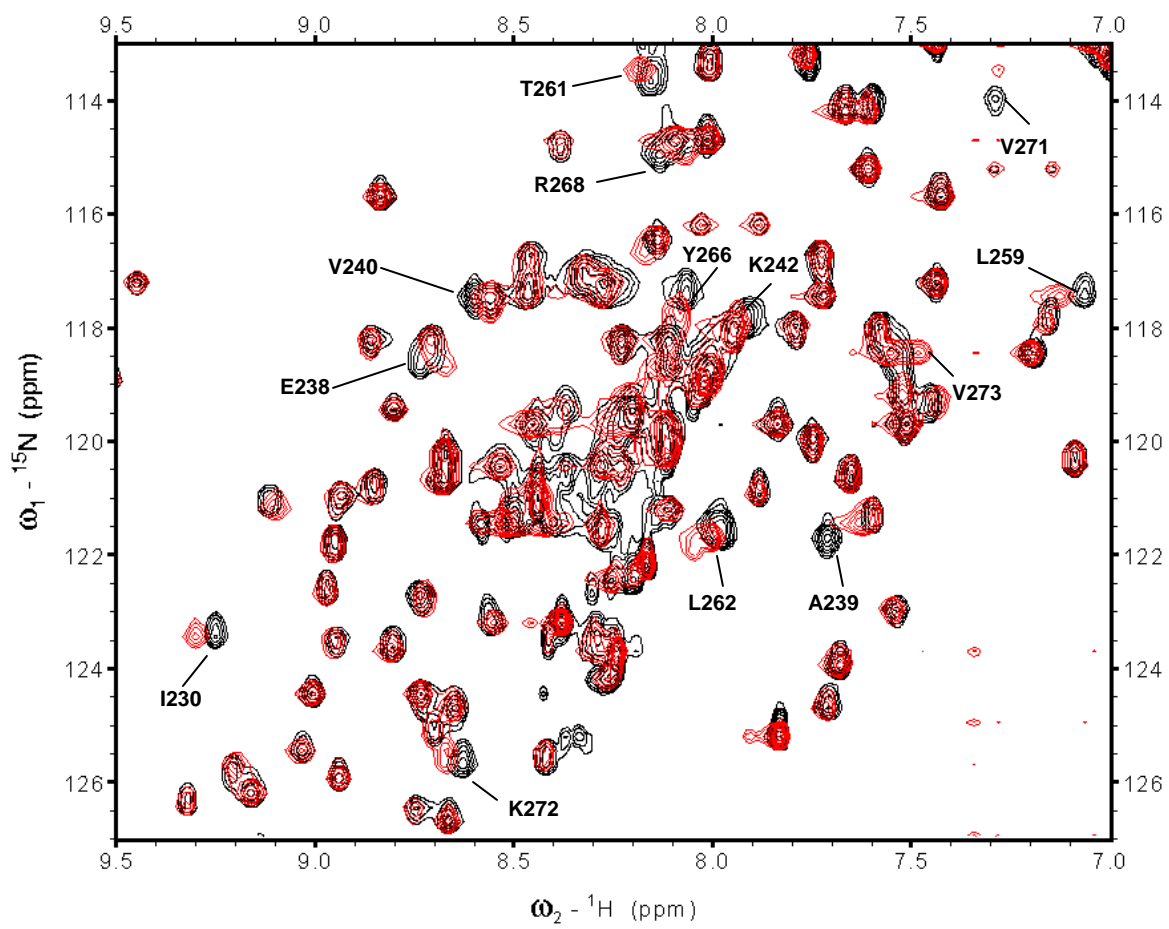

Fig.S3

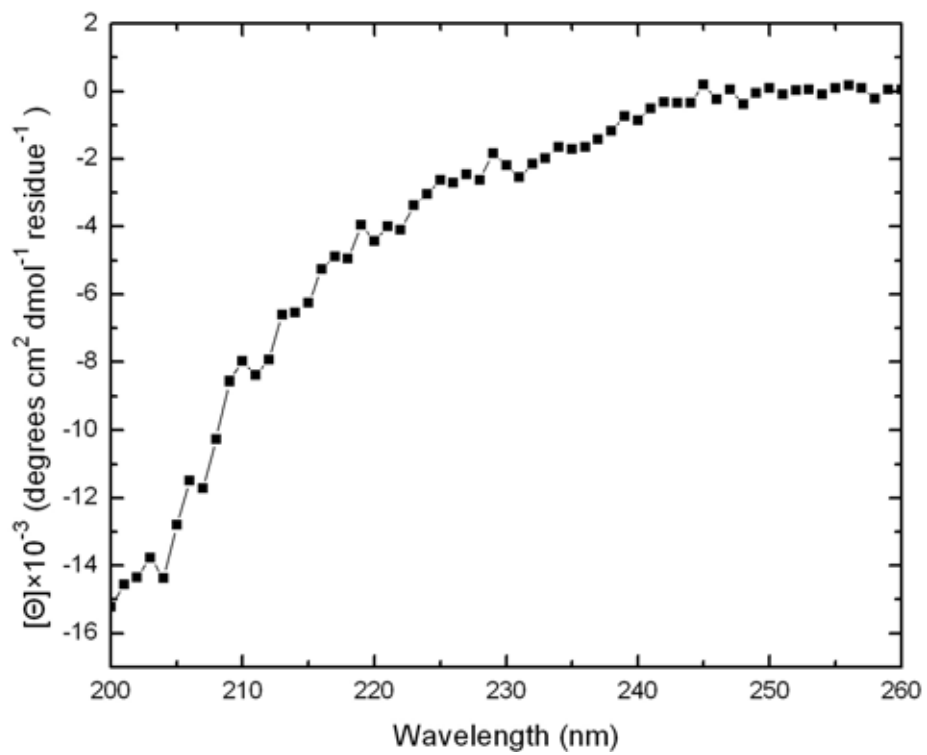



Fig.S4

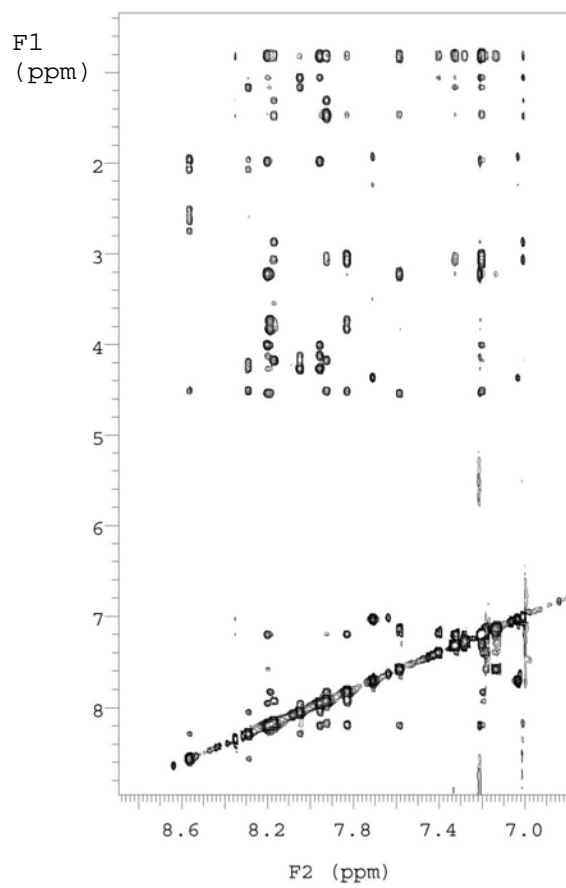

Fig.S5

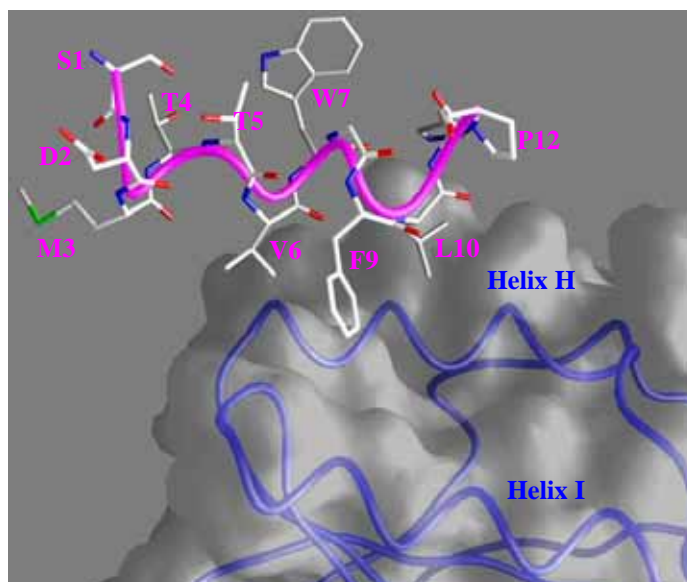

Supplement: M804818200_1.pdf [file M804818200_1.pdf]
